# Supplementary material for: Effect of cell culture density on dental pulp-derived mesenchymal stem cells with reference to osteogenic differentiation
Source: PubMed Central journal article supplement (PMC6443725; doi:10.1038/s41598-019-41741-w), 2019-04-01
Supplement: 41598_2019_41741_MOESM1_ESM.pdf [file 41598_2019_41741_MOESM1_ESM.pdf]

Effect of cell culture density on dental pulp-derived mesenchymal  
stem cells with reference to osteogenic differentiation

Sonoko Noda, Nobuyuki Kawashima, Mioko Yamamoto,  
Kentaro Hashimoto, Keisuke Nara, Ichiro Sekiya, Takashi Okiji

Supplementary Figure.S1~5

# Fig. S1

**a**

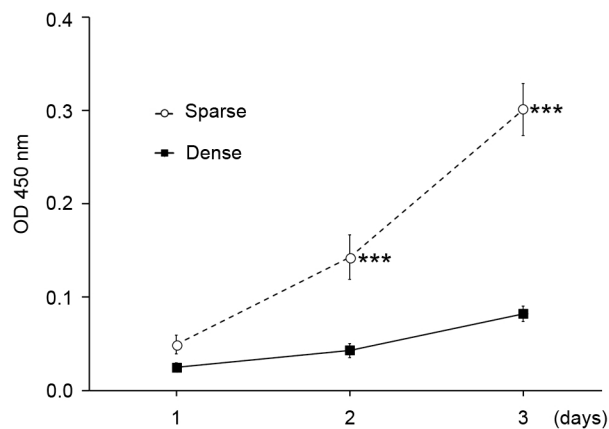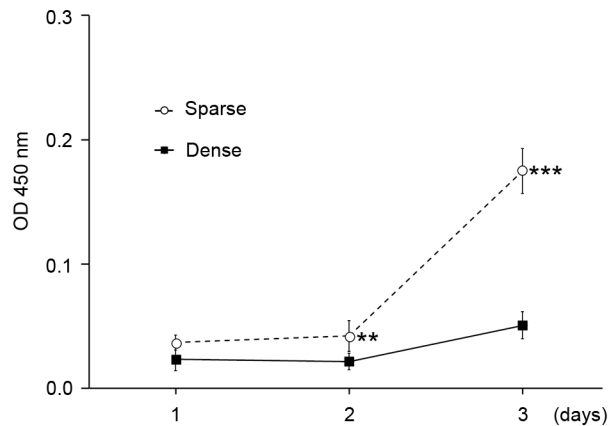

**b**

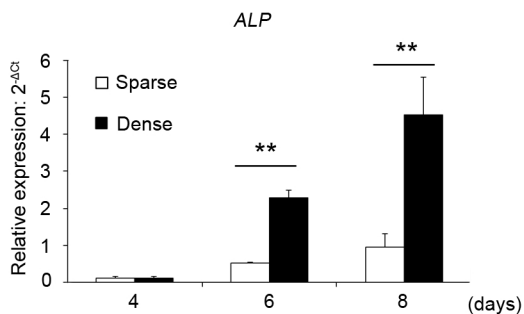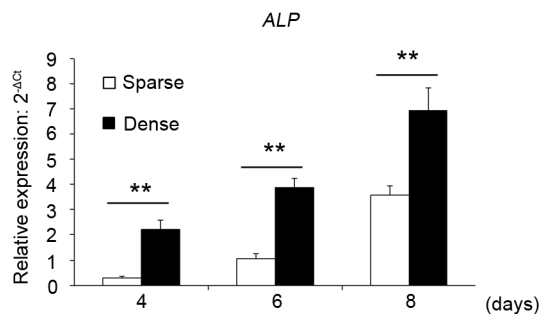

Figure S1. Cell proliferation and *ALP* mRNA expression of DPSCs in sparse (sDPSCs) and dense (dDPSCs) groups. (a) Cell proliferation. The error bar is SD ( $n = 7$ , 2 donors). \*\*\*:  $p = 0.0006$  and \*\*:  $p = 0.0012$  (Mann-Whitney U test). (b) *ALP* mRNA expression. The error bar is SD ( $n = 3$ , 2 donors).  $\Delta Ct$  was calculated as  $Ct(\text{ALP}) - Ct(\text{GAPDH})$ . \*\*:  $p = 0.004$  (F-test and Student's *t*-test).

## Fig. S2

**a**

1 day

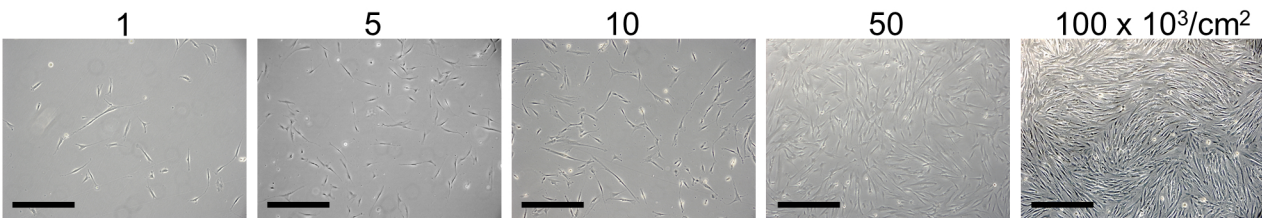

3 day

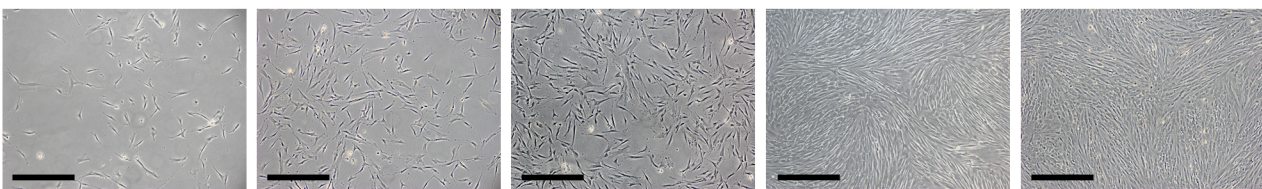

200  $\mu$ m

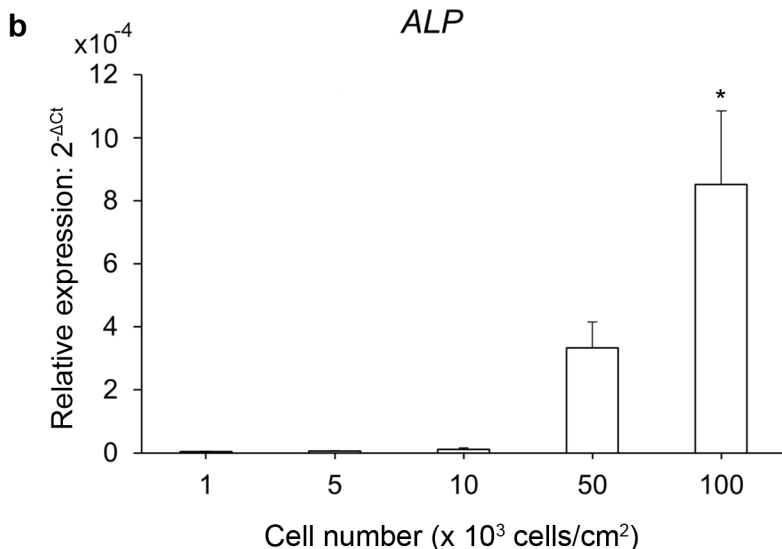

Figure S2. Phase contrast photographs and *ALP* mRNA expression of DPSCs in different seeding densities. (a) Phase contrast photographs of DPSCs at 1 and 3 days after seeding concentration (1, 5, 10, 50 and 100  $\times 10^3$  cells/cm $^2$ ). (b) *ALP* mRNA expression of DPSCs was evaluated at 3 days.  $\Delta Ct$  was calculated as Ct (*ALP*) - Ct (*GAPDH*). The error bar is SD (n=4). \*: p = 0.0202 (Kruskal–Wallis test with post-hoc Dunnett's multiple comparison test).

**Fig. S3****a**

Sparse

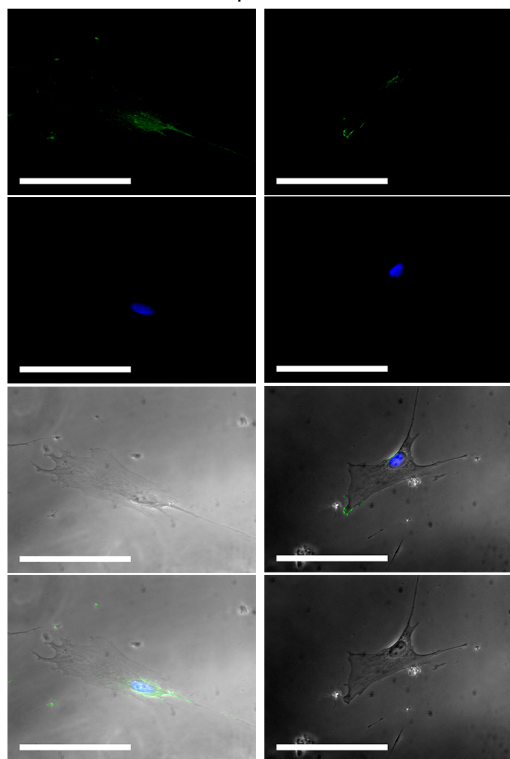100  $\mu$ m**b**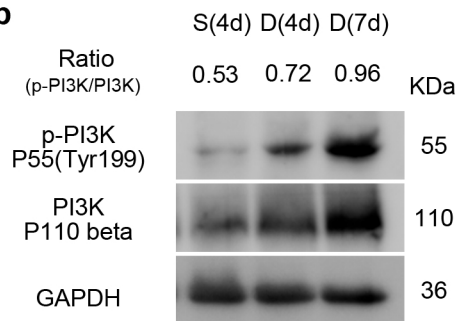**c**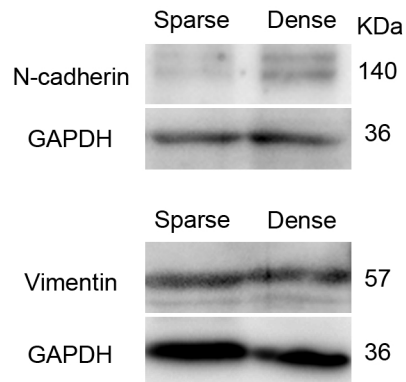

Figure S3. Integrin alpha 5 (ITGA5) expression of DPSCs by immunohistochemistry and PI3K, N-cadherin and vimentin expression of DPSCs by western blotting. (a) Integrin alpha 5 (ITGA5) expression in sDPSCs. (b) Expression of p-PI3K p55 and PI3K p110 beta in dense (dDPSCs) group cultured for 7 days (7d). (c) Expression of N-cadherin and vimentin in sparse (sDPSCs) and dense (dDPSCs) groups.

**Fig. S4**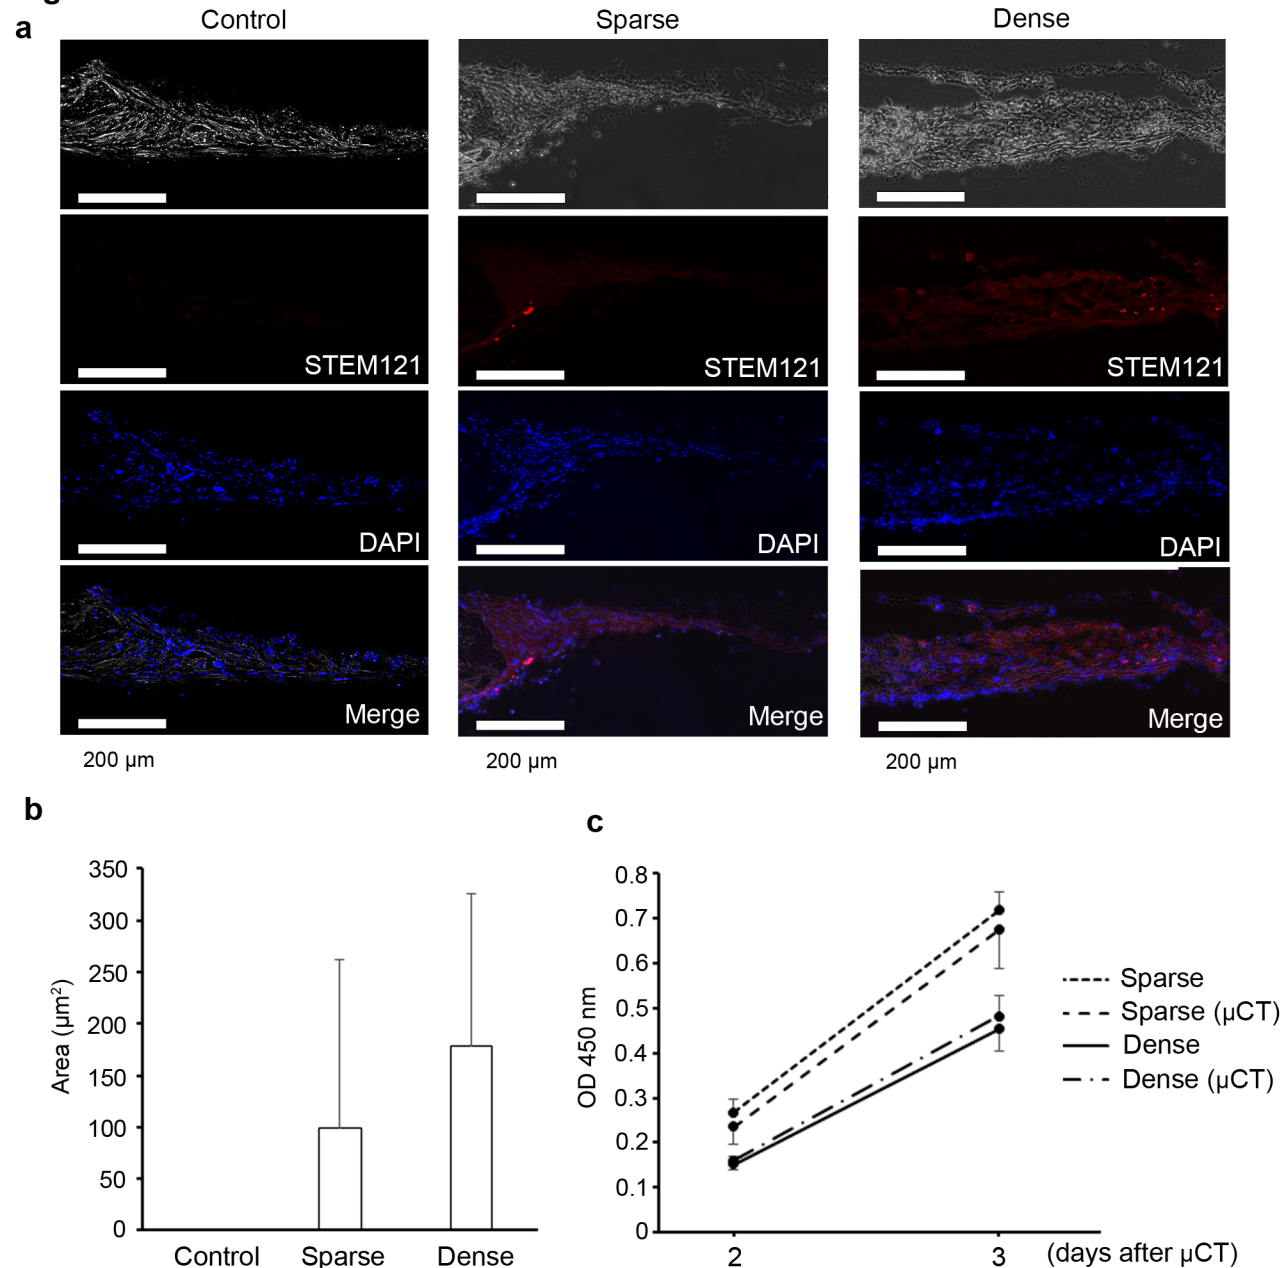

Figure S4. Stem121 immunohistochemical staining and cell proliferation assay after micro-CT scanning. (a) Representative images of Stem121<sup>+</sup> cells in each group. (b) Stem121<sup>+</sup> area was measured by Image J software. There was no significant difference in the Stem121<sup>+</sup> area between sDPSC-transplanted and dDPSC-transplanted groups (F-test and Student's *t*-test,  $n = 4$  images). (c) Cell proliferation assay after micro-CT scanning revealed that radiation by micro-CT did not affect the cell proliferation of DPSCs (Mann-Whitney U test,  $n = 7$ ).

**Fig. S5****a**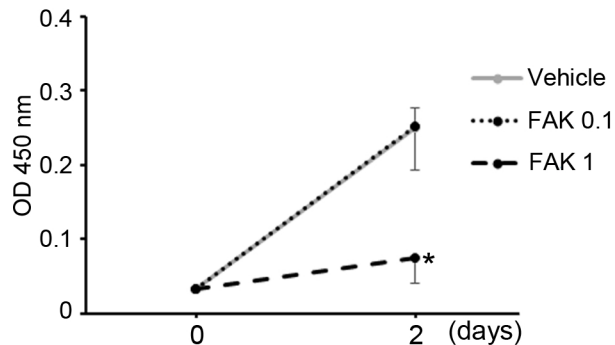**b**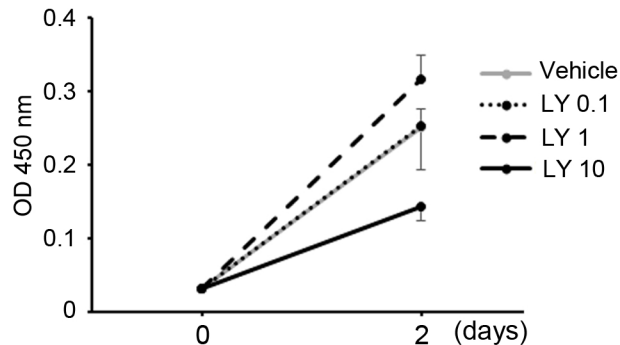

Figure S5. Proliferation assay under the presence of inhibitors. (a) FAK inhibitor 14 (Vehicle; DMSO, inhibitor; 0.1 and 1  $\mu$ M) and (b) LY294002 (Vehicle; DMSO, inhibitor; 0.1, 1 and 10  $\mu$ M) induced no harmful effect on cell proliferation except high concentration (1  $\mu$ M) of FAK inhibitor 14 \*:  $p = 0.0164$  (Kruskal–Wallis test with post-hoc Dunnett's multiple comparison test). The error bar is SD ( $n = 7$ ).
